# Supplementary material
Source: Springer Nature journal article supplement (https://www.springermedizin.de/resource/supplementary/13019_2013_824_MOESM1_ESM.pdf/9639154)

A

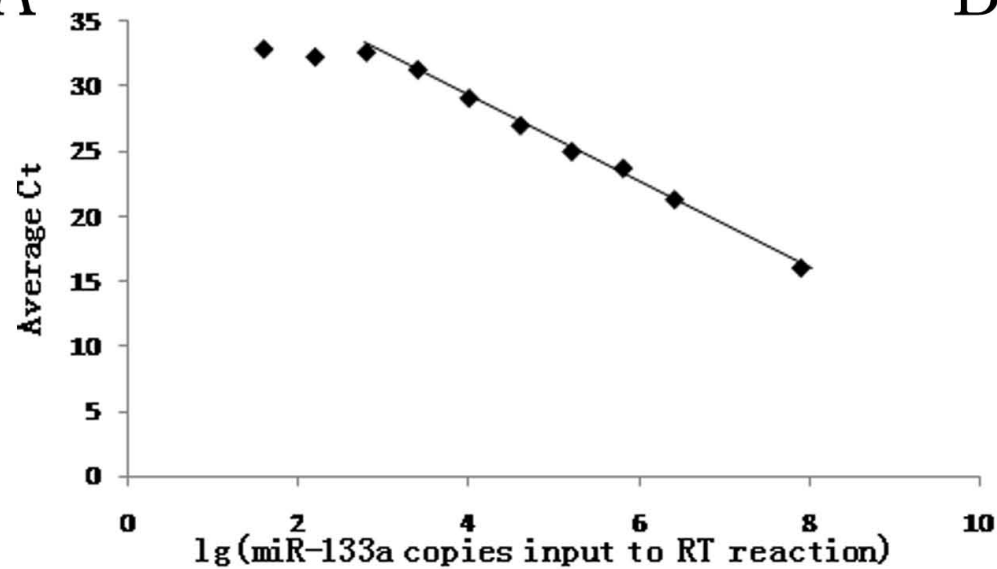

B

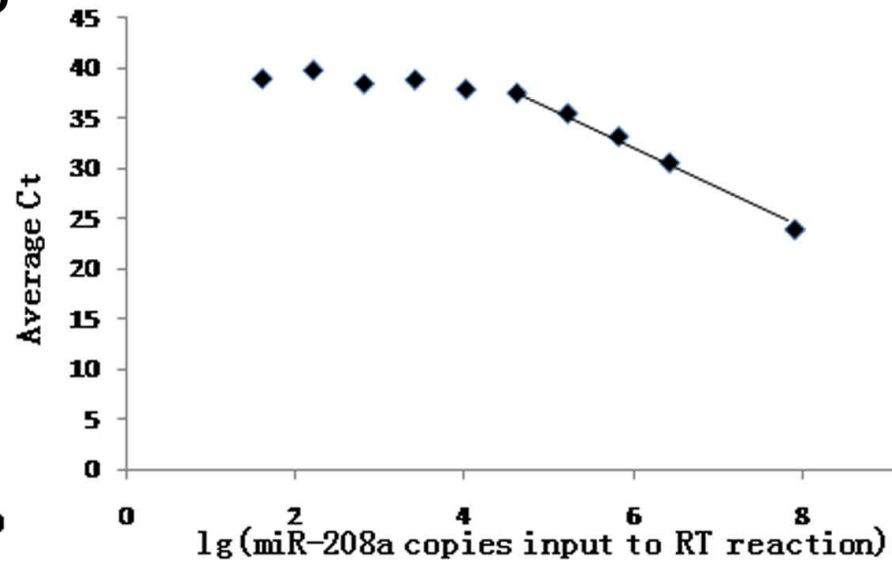

C

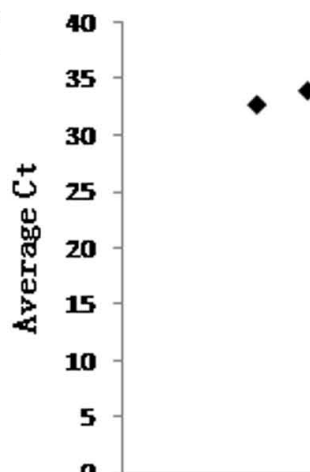

Supplement: MOESM1 [file 9639154]
